# Supplementary material for: Quantitative Analysis in Combination with Fingerprint Technology and Chemometric Analysis Applied for Evaluating Six Species of Wild Paris Using UHPLC-UV-MS
Source: PubMed Central journal article supplement (PMC5209620; doi:10.1155/2016/3182796), 2016-12-21
Supplement: 3182796.f1.pdf [file 3182796.f1.pdf]

Figure supplement

a

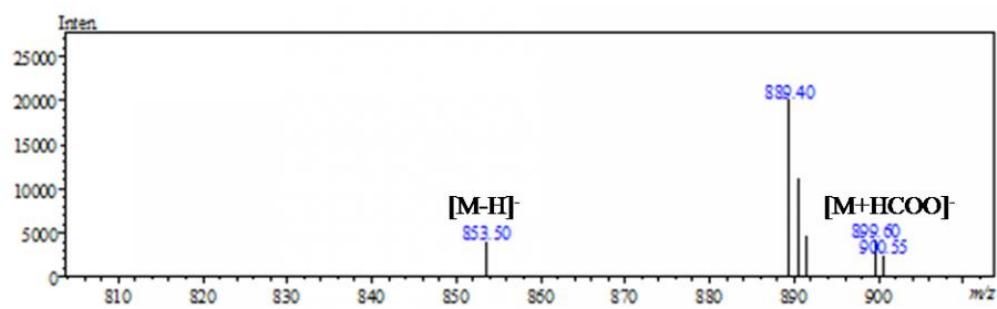

b

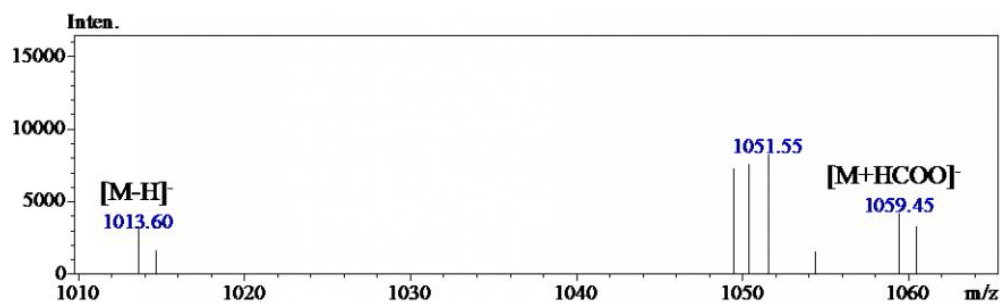

**Fig. supplement a and b** was responsible for the scan of polyphyllin I and polyphyllin II in the negative mode.
